# Supplementary material for: Revealing vertical aquifer heterogeneity and hydraulic anisotropy by pumping partially penetrating wells
Source: Springer Nature journal article supplement (doi:10.1007/s10040-022-02458-9), 2022-02-09
Supplement: MOESM1 [file 20119412]

# Hydrogeology Journal – Electronic Supplementary Material

## Revealing vertical aquifer heterogeneity and hydraulic anisotropy by pumping partially penetrating wells

Ruth Maier, Center for Applied Geoscience, University of Tübingen, Schnarrenbergstraße 94-96, 72076 Tübingen, Germany, [ruth.maier@uni-tuebingen.de](mailto:ruth.maier@uni-tuebingen.de)

Carsten Leven, Center for Applied Geoscience, University of Tübingen, Schnarrenbergstraße 94-96, 72076 Tübingen, Germany, [carsten.leven-pfister@uni-tuebingen.de](mailto:carsten.leven-pfister@uni-tuebingen.de)

Emilio Sánchez-León, Center for Applied Geoscience, University of Tübingen, Schnarrenbergstraße 94-96, 72076 Tübingen, Germany, [emilio.sanchez@uni-tuebingen.de](mailto:emilio.sanchez@uni-tuebingen.de)

Daniel Strasser, Federal Waterways Engineering and Research Institute, Kußmaulstraße 17, 76187 Karlsruhe, Germany, [daniel.strasser@baw.de](mailto:daniel.strasser@baw.de)

Maximilian Stoll, Center for Applied Geoscience, University of Tübingen, Schnarrenbergstraße 94-96, 72076 Tübingen, Germany, [maximilian.stoll@student.uni-tuebingen.de](mailto:maximilian.stoll@student.uni-tuebingen.de)

Olaf A. Cirpka, **Corresponding author**, Center for Applied Geoscience, University of Tübingen, Schnarrenbergstraße 94-96, 72076 Tübingen, Germany, [olaf.cirpka@uni-tuebingen.de](mailto:olaf.cirpka@uni-tuebingen.de)

**Section S1. Table S1 Key Data of the Monitoring Network**

|                                                          | <b>R01</b>                                                                                                                                                                             | <b>Nested observation wells north</b> | <b>Nested observation wells east</b> | <b>Nested observation wells south</b> | <b>Nested observation wells west</b> |  |      |  |      |                                                                                                                                                                                                                                                                                                                                                    |            |     |     |     |      |            |      |      |  |      |  |      |      |  |      |  |      |      |      |  |                                                                                                                                                                                                                                                                                                                                                                                                                                                                                                                                                                                                                                                                                     |            |     |     |      |      |            |      |      |      |      |  |      |      |      |      |  |      |      |      |      |  |      |      |      |      |  |      |      |      |      |  |      |      |      |      |  |      |      |      |      |                                                                                                                                                                                                                                                                                                         |            |     |     |      |            |      |      |      |  |      |      |      |  |      |      |      |                                                                                                                                                                                                                                                                                                                                                                 |            |     |     |      |      |            |      |      |      |      |  |      |      |      |      |  |      |      |      |      |
|----------------------------------------------------------|----------------------------------------------------------------------------------------------------------------------------------------------------------------------------------------|---------------------------------------|--------------------------------------|---------------------------------------|--------------------------------------|--|------|--|------|----------------------------------------------------------------------------------------------------------------------------------------------------------------------------------------------------------------------------------------------------------------------------------------------------------------------------------------------------|------------|-----|-----|-----|------|------------|------|------|--|------|--|------|------|--|------|--|------|------|------|--|-------------------------------------------------------------------------------------------------------------------------------------------------------------------------------------------------------------------------------------------------------------------------------------------------------------------------------------------------------------------------------------------------------------------------------------------------------------------------------------------------------------------------------------------------------------------------------------------------------------------------------------------------------------------------------------|------------|-----|-----|------|------|------------|------|------|------|------|--|------|------|------|------|--|------|------|------|------|--|------|------|------|------|--|------|------|------|------|--|------|------|------|------|--|------|------|------|------|---------------------------------------------------------------------------------------------------------------------------------------------------------------------------------------------------------------------------------------------------------------------------------------------------------|------------|-----|-----|------|------------|------|------|------|--|------|------|------|--|------|------|------|-----------------------------------------------------------------------------------------------------------------------------------------------------------------------------------------------------------------------------------------------------------------------------------------------------------------------------------------------------------------|------------|-----|-----|------|------|------------|------|------|------|------|--|------|------|------|------|--|------|------|------|------|
| <b>Purpose of well</b>                                   | Pumping well                                                                                                                                                                           | Observation well                      | Observation well                     | Observation well                      | Observation well                     |  |      |  |      |                                                                                                                                                                                                                                                                                                                                                    |            |     |     |     |      |            |      |      |  |      |  |      |      |  |      |  |      |      |      |  |                                                                                                                                                                                                                                                                                                                                                                                                                                                                                                                                                                                                                                                                                     |            |     |     |      |      |            |      |      |      |      |  |      |      |      |      |  |      |      |      |      |  |      |      |      |      |  |      |      |      |      |  |      |      |      |      |  |      |      |      |      |                                                                                                                                                                                                                                                                                                         |            |     |     |      |            |      |      |      |  |      |      |      |  |      |      |      |                                                                                                                                                                                                                                                                                                                                                                 |            |     |     |      |      |            |      |      |      |      |  |      |      |      |      |  |      |      |      |      |
| <b>Well type</b>                                         | Large-diameter well                                                                                                                                                                    | Well bundle of three piezometers      | Multi-channel tubing well            | Well bundle of three piezometers      | Well bundle of three piezometers     |  |      |  |      |                                                                                                                                                                                                                                                                                                                                                    |            |     |     |     |      |            |      |      |  |      |  |      |      |  |      |  |      |      |      |  |                                                                                                                                                                                                                                                                                                                                                                                                                                                                                                                                                                                                                                                                                     |            |     |     |      |      |            |      |      |      |      |  |      |      |      |      |  |      |      |      |      |  |      |      |      |      |  |      |      |      |      |  |      |      |      |      |  |      |      |      |      |                                                                                                                                                                                                                                                                                                         |            |     |     |      |            |      |      |      |  |      |      |      |  |      |      |      |                                                                                                                                                                                                                                                                                                                                                                 |            |     |     |      |      |            |      |      |      |      |  |      |      |      |      |  |      |      |      |      |
| <b>Diameter [m]</b>                                      | 0.8                                                                                                                                                                                    | 0.0254                                | 0.01 per channel                     | 0.0254                                | 0.0254                               |  |      |  |      |                                                                                                                                                                                                                                                                                                                                                    |            |     |     |     |      |            |      |      |  |      |  |      |      |  |      |  |      |      |      |  |                                                                                                                                                                                                                                                                                                                                                                                                                                                                                                                                                                                                                                                                                     |            |     |     |      |      |            |      |      |      |      |  |      |      |      |      |  |      |      |      |      |  |      |      |      |      |  |      |      |      |      |  |      |      |      |      |  |      |      |      |      |                                                                                                                                                                                                                                                                                                         |            |     |     |      |            |      |      |      |  |      |      |      |  |      |      |      |                                                                                                                                                                                                                                                                                                                                                                 |            |     |     |      |      |            |      |      |      |      |  |      |      |      |      |  |      |      |      |      |
| <b>Number of screens</b>                                 | 3                                                                                                                                                                                      | 3                                     | 7                                    | 3                                     | 3                                    |  |      |  |      |                                                                                                                                                                                                                                                                                                                                                    |            |     |     |     |      |            |      |      |  |      |  |      |      |  |      |  |      |      |      |  |                                                                                                                                                                                                                                                                                                                                                                                                                                                                                                                                                                                                                                                                                     |            |     |     |      |      |            |      |      |      |      |  |      |      |      |      |  |      |      |      |      |  |      |      |      |      |  |      |      |      |      |  |      |      |      |      |  |      |      |      |      |                                                                                                                                                                                                                                                                                                         |            |     |     |      |            |      |      |      |  |      |      |      |  |      |      |      |                                                                                                                                                                                                                                                                                                                                                                 |            |     |     |      |      |            |      |      |      |      |  |      |      |      |      |  |      |      |      |      |
| <b>Length of screen sections [m]</b>                     | 2                                                                                                                                                                                      | 0.3                                   | Channel 1-6: 0.4<br>Channel 7: 0.15  | 0.3                                   | 0.3                                  |  |      |  |      |                                                                                                                                                                                                                                                                                                                                                    |            |     |     |     |      |            |      |      |  |      |  |      |      |  |      |  |      |      |      |  |                                                                                                                                                                                                                                                                                                                                                                                                                                                                                                                                                                                                                                                                                     |            |     |     |      |      |            |      |      |      |      |  |      |      |      |      |  |      |      |      |      |  |      |      |      |      |  |      |      |      |      |  |      |      |      |      |  |      |      |      |      |                                                                                                                                                                                                                                                                                                         |            |     |     |      |            |      |      |      |  |      |      |      |  |      |      |      |                                                                                                                                                                                                                                                                                                                                                                 |            |     |     |      |      |            |      |      |      |      |  |      |      |      |      |  |      |      |      |      |
| <b>Distance r- and elevation from aquifer base z [m]</b> | <table border="1"> <tr> <td><i>r</i>→</td> <td>0</td> </tr> <tr> <td><i>z</i>↓</td> <td>37.3</td> </tr> <tr> <td></td> <td>30.8</td> </tr> <tr> <td></td> <td>24.3</td> </tr> </table> | <i>r</i> →                            | 0                                    | <i>z</i> ↓                            | 37.3                                 |  | 30.8 |  | 24.3 | <table border="1"> <tr> <td><i>r</i>→</td> <td>3.4</td> <td>6.5</td> <td>9.4</td> <td>10.4</td> </tr> <tr> <td><i>z</i>↓</td> <td>35.4</td> <td>35.3</td> <td></td> <td>35.2</td> </tr> <tr> <td></td> <td>32.2</td> <td>32.3</td> <td></td> <td>32.5</td> </tr> <tr> <td></td> <td>28.5</td> <td>29.3</td> <td>30.6</td> <td></td> </tr> </table> | <i>r</i> → | 3.4 | 6.5 | 9.4 | 10.4 | <i>z</i> ↓ | 35.4 | 35.3 |  | 35.2 |  | 32.2 | 32.3 |  | 32.5 |  | 28.5 | 29.3 | 30.6 |  | <table border="1"> <tr> <td><i>r</i>→</td> <td>3.3</td> <td>6.8</td> <td>10.7</td> <td>20.9</td> </tr> <tr> <td><i>z</i>↓</td> <td>39.1</td> <td>38.9</td> <td>38.9</td> <td>38.7</td> </tr> <tr> <td></td> <td>37.0</td> <td>36.9</td> <td>36.9</td> <td>36.9</td> </tr> <tr> <td></td> <td>33.8</td> <td>33.1</td> <td>33.9</td> <td>33.9</td> </tr> <tr> <td></td> <td>30.3</td> <td>30.4</td> <td>30.4</td> <td>30.6</td> </tr> <tr> <td></td> <td>26.8</td> <td>27.1</td> <td>27.1</td> <td>27.9</td> </tr> <tr> <td></td> <td>23.8</td> <td>23.9</td> <td>24.0</td> <td>23.9</td> </tr> <tr> <td></td> <td>21.0</td> <td>20.9</td> <td>20.9</td> <td>20.8</td> </tr> </table> | <i>r</i> → | 3.3 | 6.8 | 10.7 | 20.9 | <i>z</i> ↓ | 39.1 | 38.9 | 38.9 | 38.7 |  | 37.0 | 36.9 | 36.9 | 36.9 |  | 33.8 | 33.1 | 33.9 | 33.9 |  | 30.3 | 30.4 | 30.4 | 30.6 |  | 26.8 | 27.1 | 27.1 | 27.9 |  | 23.8 | 23.9 | 24.0 | 23.9 |  | 21.0 | 20.9 | 20.9 | 20.8 | <table border="1"> <tr> <td><i>r</i>→</td> <td>3.6</td> <td>6.3</td> <td>10.4</td> </tr> <tr> <td><i>z</i>↓</td> <td>35.3</td> <td>35.8</td> <td>35.5</td> </tr> <tr> <td></td> <td>32.4</td> <td>31.5</td> <td>32.7</td> </tr> <tr> <td></td> <td>28.5</td> <td>28.6</td> <td>28.7</td> </tr> </table> | <i>r</i> → | 3.6 | 6.3 | 10.4 | <i>z</i> ↓ | 35.3 | 35.8 | 35.5 |  | 32.4 | 31.5 | 32.7 |  | 28.5 | 28.6 | 28.7 | <table border="1"> <tr> <td><i>r</i>→</td> <td>3.5</td> <td>6.2</td> <td>10.2</td> <td>21.0</td> </tr> <tr> <td><i>z</i>↓</td> <td>35.8</td> <td>35.3</td> <td>35.4</td> <td>35.6</td> </tr> <tr> <td></td> <td>32.3</td> <td>32.4</td> <td>32.4</td> <td>32.2</td> </tr> <tr> <td></td> <td>28.3</td> <td>28.4</td> <td>28.5</td> <td>27.9</td> </tr> </table> | <i>r</i> → | 3.5 | 6.2 | 10.2 | 21.0 | <i>z</i> ↓ | 35.8 | 35.3 | 35.4 | 35.6 |  | 32.3 | 32.4 | 32.4 | 32.2 |  | 28.3 | 28.4 | 28.5 | 27.9 |
| <i>r</i> →                                               | 0                                                                                                                                                                                      |                                       |                                      |                                       |                                      |  |      |  |      |                                                                                                                                                                                                                                                                                                                                                    |            |     |     |     |      |            |      |      |  |      |  |      |      |  |      |  |      |      |      |  |                                                                                                                                                                                                                                                                                                                                                                                                                                                                                                                                                                                                                                                                                     |            |     |     |      |      |            |      |      |      |      |  |      |      |      |      |  |      |      |      |      |  |      |      |      |      |  |      |      |      |      |  |      |      |      |      |  |      |      |      |      |                                                                                                                                                                                                                                                                                                         |            |     |     |      |            |      |      |      |  |      |      |      |  |      |      |      |                                                                                                                                                                                                                                                                                                                                                                 |            |     |     |      |      |            |      |      |      |      |  |      |      |      |      |  |      |      |      |      |
| <i>z</i> ↓                                               | 37.3                                                                                                                                                                                   |                                       |                                      |                                       |                                      |  |      |  |      |                                                                                                                                                                                                                                                                                                                                                    |            |     |     |     |      |            |      |      |  |      |  |      |      |  |      |  |      |      |      |  |                                                                                                                                                                                                                                                                                                                                                                                                                                                                                                                                                                                                                                                                                     |            |     |     |      |      |            |      |      |      |      |  |      |      |      |      |  |      |      |      |      |  |      |      |      |      |  |      |      |      |      |  |      |      |      |      |  |      |      |      |      |                                                                                                                                                                                                                                                                                                         |            |     |     |      |            |      |      |      |  |      |      |      |  |      |      |      |                                                                                                                                                                                                                                                                                                                                                                 |            |     |     |      |      |            |      |      |      |      |  |      |      |      |      |  |      |      |      |      |
|                                                          | 30.8                                                                                                                                                                                   |                                       |                                      |                                       |                                      |  |      |  |      |                                                                                                                                                                                                                                                                                                                                                    |            |     |     |     |      |            |      |      |  |      |  |      |      |  |      |  |      |      |      |  |                                                                                                                                                                                                                                                                                                                                                                                                                                                                                                                                                                                                                                                                                     |            |     |     |      |      |            |      |      |      |      |  |      |      |      |      |  |      |      |      |      |  |      |      |      |      |  |      |      |      |      |  |      |      |      |      |  |      |      |      |      |                                                                                                                                                                                                                                                                                                         |            |     |     |      |            |      |      |      |  |      |      |      |  |      |      |      |                                                                                                                                                                                                                                                                                                                                                                 |            |     |     |      |      |            |      |      |      |      |  |      |      |      |      |  |      |      |      |      |
|                                                          | 24.3                                                                                                                                                                                   |                                       |                                      |                                       |                                      |  |      |  |      |                                                                                                                                                                                                                                                                                                                                                    |            |     |     |     |      |            |      |      |  |      |  |      |      |  |      |  |      |      |      |  |                                                                                                                                                                                                                                                                                                                                                                                                                                                                                                                                                                                                                                                                                     |            |     |     |      |      |            |      |      |      |      |  |      |      |      |      |  |      |      |      |      |  |      |      |      |      |  |      |      |      |      |  |      |      |      |      |  |      |      |      |      |                                                                                                                                                                                                                                                                                                         |            |     |     |      |            |      |      |      |  |      |      |      |  |      |      |      |                                                                                                                                                                                                                                                                                                                                                                 |            |     |     |      |      |            |      |      |      |      |  |      |      |      |      |  |      |      |      |      |
| <i>r</i> →                                               | 3.4                                                                                                                                                                                    | 6.5                                   | 9.4                                  | 10.4                                  |                                      |  |      |  |      |                                                                                                                                                                                                                                                                                                                                                    |            |     |     |     |      |            |      |      |  |      |  |      |      |  |      |  |      |      |      |  |                                                                                                                                                                                                                                                                                                                                                                                                                                                                                                                                                                                                                                                                                     |            |     |     |      |      |            |      |      |      |      |  |      |      |      |      |  |      |      |      |      |  |      |      |      |      |  |      |      |      |      |  |      |      |      |      |  |      |      |      |      |                                                                                                                                                                                                                                                                                                         |            |     |     |      |            |      |      |      |  |      |      |      |  |      |      |      |                                                                                                                                                                                                                                                                                                                                                                 |            |     |     |      |      |            |      |      |      |      |  |      |      |      |      |  |      |      |      |      |
| <i>z</i> ↓                                               | 35.4                                                                                                                                                                                   | 35.3                                  |                                      | 35.2                                  |                                      |  |      |  |      |                                                                                                                                                                                                                                                                                                                                                    |            |     |     |     |      |            |      |      |  |      |  |      |      |  |      |  |      |      |      |  |                                                                                                                                                                                                                                                                                                                                                                                                                                                                                                                                                                                                                                                                                     |            |     |     |      |      |            |      |      |      |      |  |      |      |      |      |  |      |      |      |      |  |      |      |      |      |  |      |      |      |      |  |      |      |      |      |  |      |      |      |      |                                                                                                                                                                                                                                                                                                         |            |     |     |      |            |      |      |      |  |      |      |      |  |      |      |      |                                                                                                                                                                                                                                                                                                                                                                 |            |     |     |      |      |            |      |      |      |      |  |      |      |      |      |  |      |      |      |      |
|                                                          | 32.2                                                                                                                                                                                   | 32.3                                  |                                      | 32.5                                  |                                      |  |      |  |      |                                                                                                                                                                                                                                                                                                                                                    |            |     |     |     |      |            |      |      |  |      |  |      |      |  |      |  |      |      |      |  |                                                                                                                                                                                                                                                                                                                                                                                                                                                                                                                                                                                                                                                                                     |            |     |     |      |      |            |      |      |      |      |  |      |      |      |      |  |      |      |      |      |  |      |      |      |      |  |      |      |      |      |  |      |      |      |      |  |      |      |      |      |                                                                                                                                                                                                                                                                                                         |            |     |     |      |            |      |      |      |  |      |      |      |  |      |      |      |                                                                                                                                                                                                                                                                                                                                                                 |            |     |     |      |      |            |      |      |      |      |  |      |      |      |      |  |      |      |      |      |
|                                                          | 28.5                                                                                                                                                                                   | 29.3                                  | 30.6                                 |                                       |                                      |  |      |  |      |                                                                                                                                                                                                                                                                                                                                                    |            |     |     |     |      |            |      |      |  |      |  |      |      |  |      |  |      |      |      |  |                                                                                                                                                                                                                                                                                                                                                                                                                                                                                                                                                                                                                                                                                     |            |     |     |      |      |            |      |      |      |      |  |      |      |      |      |  |      |      |      |      |  |      |      |      |      |  |      |      |      |      |  |      |      |      |      |  |      |      |      |      |                                                                                                                                                                                                                                                                                                         |            |     |     |      |            |      |      |      |  |      |      |      |  |      |      |      |                                                                                                                                                                                                                                                                                                                                                                 |            |     |     |      |      |            |      |      |      |      |  |      |      |      |      |  |      |      |      |      |
| <i>r</i> →                                               | 3.3                                                                                                                                                                                    | 6.8                                   | 10.7                                 | 20.9                                  |                                      |  |      |  |      |                                                                                                                                                                                                                                                                                                                                                    |            |     |     |     |      |            |      |      |  |      |  |      |      |  |      |  |      |      |      |  |                                                                                                                                                                                                                                                                                                                                                                                                                                                                                                                                                                                                                                                                                     |            |     |     |      |      |            |      |      |      |      |  |      |      |      |      |  |      |      |      |      |  |      |      |      |      |  |      |      |      |      |  |      |      |      |      |  |      |      |      |      |                                                                                                                                                                                                                                                                                                         |            |     |     |      |            |      |      |      |  |      |      |      |  |      |      |      |                                                                                                                                                                                                                                                                                                                                                                 |            |     |     |      |      |            |      |      |      |      |  |      |      |      |      |  |      |      |      |      |
| <i>z</i> ↓                                               | 39.1                                                                                                                                                                                   | 38.9                                  | 38.9                                 | 38.7                                  |                                      |  |      |  |      |                                                                                                                                                                                                                                                                                                                                                    |            |     |     |     |      |            |      |      |  |      |  |      |      |  |      |  |      |      |      |  |                                                                                                                                                                                                                                                                                                                                                                                                                                                                                                                                                                                                                                                                                     |            |     |     |      |      |            |      |      |      |      |  |      |      |      |      |  |      |      |      |      |  |      |      |      |      |  |      |      |      |      |  |      |      |      |      |  |      |      |      |      |                                                                                                                                                                                                                                                                                                         |            |     |     |      |            |      |      |      |  |      |      |      |  |      |      |      |                                                                                                                                                                                                                                                                                                                                                                 |            |     |     |      |      |            |      |      |      |      |  |      |      |      |      |  |      |      |      |      |
|                                                          | 37.0                                                                                                                                                                                   | 36.9                                  | 36.9                                 | 36.9                                  |                                      |  |      |  |      |                                                                                                                                                                                                                                                                                                                                                    |            |     |     |     |      |            |      |      |  |      |  |      |      |  |      |  |      |      |      |  |                                                                                                                                                                                                                                                                                                                                                                                                                                                                                                                                                                                                                                                                                     |            |     |     |      |      |            |      |      |      |      |  |      |      |      |      |  |      |      |      |      |  |      |      |      |      |  |      |      |      |      |  |      |      |      |      |  |      |      |      |      |                                                                                                                                                                                                                                                                                                         |            |     |     |      |            |      |      |      |  |      |      |      |  |      |      |      |                                                                                                                                                                                                                                                                                                                                                                 |            |     |     |      |      |            |      |      |      |      |  |      |      |      |      |  |      |      |      |      |
|                                                          | 33.8                                                                                                                                                                                   | 33.1                                  | 33.9                                 | 33.9                                  |                                      |  |      |  |      |                                                                                                                                                                                                                                                                                                                                                    |            |     |     |     |      |            |      |      |  |      |  |      |      |  |      |  |      |      |      |  |                                                                                                                                                                                                                                                                                                                                                                                                                                                                                                                                                                                                                                                                                     |            |     |     |      |      |            |      |      |      |      |  |      |      |      |      |  |      |      |      |      |  |      |      |      |      |  |      |      |      |      |  |      |      |      |      |  |      |      |      |      |                                                                                                                                                                                                                                                                                                         |            |     |     |      |            |      |      |      |  |      |      |      |  |      |      |      |                                                                                                                                                                                                                                                                                                                                                                 |            |     |     |      |      |            |      |      |      |      |  |      |      |      |      |  |      |      |      |      |
|                                                          | 30.3                                                                                                                                                                                   | 30.4                                  | 30.4                                 | 30.6                                  |                                      |  |      |  |      |                                                                                                                                                                                                                                                                                                                                                    |            |     |     |     |      |            |      |      |  |      |  |      |      |  |      |  |      |      |      |  |                                                                                                                                                                                                                                                                                                                                                                                                                                                                                                                                                                                                                                                                                     |            |     |     |      |      |            |      |      |      |      |  |      |      |      |      |  |      |      |      |      |  |      |      |      |      |  |      |      |      |      |  |      |      |      |      |  |      |      |      |      |                                                                                                                                                                                                                                                                                                         |            |     |     |      |            |      |      |      |  |      |      |      |  |      |      |      |                                                                                                                                                                                                                                                                                                                                                                 |            |     |     |      |      |            |      |      |      |      |  |      |      |      |      |  |      |      |      |      |
|                                                          | 26.8                                                                                                                                                                                   | 27.1                                  | 27.1                                 | 27.9                                  |                                      |  |      |  |      |                                                                                                                                                                                                                                                                                                                                                    |            |     |     |     |      |            |      |      |  |      |  |      |      |  |      |  |      |      |      |  |                                                                                                                                                                                                                                                                                                                                                                                                                                                                                                                                                                                                                                                                                     |            |     |     |      |      |            |      |      |      |      |  |      |      |      |      |  |      |      |      |      |  |      |      |      |      |  |      |      |      |      |  |      |      |      |      |  |      |      |      |      |                                                                                                                                                                                                                                                                                                         |            |     |     |      |            |      |      |      |  |      |      |      |  |      |      |      |                                                                                                                                                                                                                                                                                                                                                                 |            |     |     |      |      |            |      |      |      |      |  |      |      |      |      |  |      |      |      |      |
|                                                          | 23.8                                                                                                                                                                                   | 23.9                                  | 24.0                                 | 23.9                                  |                                      |  |      |  |      |                                                                                                                                                                                                                                                                                                                                                    |            |     |     |     |      |            |      |      |  |      |  |      |      |  |      |  |      |      |      |  |                                                                                                                                                                                                                                                                                                                                                                                                                                                                                                                                                                                                                                                                                     |            |     |     |      |      |            |      |      |      |      |  |      |      |      |      |  |      |      |      |      |  |      |      |      |      |  |      |      |      |      |  |      |      |      |      |  |      |      |      |      |                                                                                                                                                                                                                                                                                                         |            |     |     |      |            |      |      |      |  |      |      |      |  |      |      |      |                                                                                                                                                                                                                                                                                                                                                                 |            |     |     |      |      |            |      |      |      |      |  |      |      |      |      |  |      |      |      |      |
|                                                          | 21.0                                                                                                                                                                                   | 20.9                                  | 20.9                                 | 20.8                                  |                                      |  |      |  |      |                                                                                                                                                                                                                                                                                                                                                    |            |     |     |     |      |            |      |      |  |      |  |      |      |  |      |  |      |      |      |  |                                                                                                                                                                                                                                                                                                                                                                                                                                                                                                                                                                                                                                                                                     |            |     |     |      |      |            |      |      |      |      |  |      |      |      |      |  |      |      |      |      |  |      |      |      |      |  |      |      |      |      |  |      |      |      |      |  |      |      |      |      |                                                                                                                                                                                                                                                                                                         |            |     |     |      |            |      |      |      |  |      |      |      |  |      |      |      |                                                                                                                                                                                                                                                                                                                                                                 |            |     |     |      |      |            |      |      |      |      |  |      |      |      |      |  |      |      |      |      |
| <i>r</i> →                                               | 3.6                                                                                                                                                                                    | 6.3                                   | 10.4                                 |                                       |                                      |  |      |  |      |                                                                                                                                                                                                                                                                                                                                                    |            |     |     |     |      |            |      |      |  |      |  |      |      |  |      |  |      |      |      |  |                                                                                                                                                                                                                                                                                                                                                                                                                                                                                                                                                                                                                                                                                     |            |     |     |      |      |            |      |      |      |      |  |      |      |      |      |  |      |      |      |      |  |      |      |      |      |  |      |      |      |      |  |      |      |      |      |  |      |      |      |      |                                                                                                                                                                                                                                                                                                         |            |     |     |      |            |      |      |      |  |      |      |      |  |      |      |      |                                                                                                                                                                                                                                                                                                                                                                 |            |     |     |      |      |            |      |      |      |      |  |      |      |      |      |  |      |      |      |      |
| <i>z</i> ↓                                               | 35.3                                                                                                                                                                                   | 35.8                                  | 35.5                                 |                                       |                                      |  |      |  |      |                                                                                                                                                                                                                                                                                                                                                    |            |     |     |     |      |            |      |      |  |      |  |      |      |  |      |  |      |      |      |  |                                                                                                                                                                                                                                                                                                                                                                                                                                                                                                                                                                                                                                                                                     |            |     |     |      |      |            |      |      |      |      |  |      |      |      |      |  |      |      |      |      |  |      |      |      |      |  |      |      |      |      |  |      |      |      |      |  |      |      |      |      |                                                                                                                                                                                                                                                                                                         |            |     |     |      |            |      |      |      |  |      |      |      |  |      |      |      |                                                                                                                                                                                                                                                                                                                                                                 |            |     |     |      |      |            |      |      |      |      |  |      |      |      |      |  |      |      |      |      |
|                                                          | 32.4                                                                                                                                                                                   | 31.5                                  | 32.7                                 |                                       |                                      |  |      |  |      |                                                                                                                                                                                                                                                                                                                                                    |            |     |     |     |      |            |      |      |  |      |  |      |      |  |      |  |      |      |      |  |                                                                                                                                                                                                                                                                                                                                                                                                                                                                                                                                                                                                                                                                                     |            |     |     |      |      |            |      |      |      |      |  |      |      |      |      |  |      |      |      |      |  |      |      |      |      |  |      |      |      |      |  |      |      |      |      |  |      |      |      |      |                                                                                                                                                                                                                                                                                                         |            |     |     |      |            |      |      |      |  |      |      |      |  |      |      |      |                                                                                                                                                                                                                                                                                                                                                                 |            |     |     |      |      |            |      |      |      |      |  |      |      |      |      |  |      |      |      |      |
|                                                          | 28.5                                                                                                                                                                                   | 28.6                                  | 28.7                                 |                                       |                                      |  |      |  |      |                                                                                                                                                                                                                                                                                                                                                    |            |     |     |     |      |            |      |      |  |      |  |      |      |  |      |  |      |      |      |  |                                                                                                                                                                                                                                                                                                                                                                                                                                                                                                                                                                                                                                                                                     |            |     |     |      |      |            |      |      |      |      |  |      |      |      |      |  |      |      |      |      |  |      |      |      |      |  |      |      |      |      |  |      |      |      |      |  |      |      |      |      |                                                                                                                                                                                                                                                                                                         |            |     |     |      |            |      |      |      |  |      |      |      |  |      |      |      |                                                                                                                                                                                                                                                                                                                                                                 |            |     |     |      |      |            |      |      |      |      |  |      |      |      |      |  |      |      |      |      |
| <i>r</i> →                                               | 3.5                                                                                                                                                                                    | 6.2                                   | 10.2                                 | 21.0                                  |                                      |  |      |  |      |                                                                                                                                                                                                                                                                                                                                                    |            |     |     |     |      |            |      |      |  |      |  |      |      |  |      |  |      |      |      |  |                                                                                                                                                                                                                                                                                                                                                                                                                                                                                                                                                                                                                                                                                     |            |     |     |      |      |            |      |      |      |      |  |      |      |      |      |  |      |      |      |      |  |      |      |      |      |  |      |      |      |      |  |      |      |      |      |  |      |      |      |      |                                                                                                                                                                                                                                                                                                         |            |     |     |      |            |      |      |      |  |      |      |      |  |      |      |      |                                                                                                                                                                                                                                                                                                                                                                 |            |     |     |      |      |            |      |      |      |      |  |      |      |      |      |  |      |      |      |      |
| <i>z</i> ↓                                               | 35.8                                                                                                                                                                                   | 35.3                                  | 35.4                                 | 35.6                                  |                                      |  |      |  |      |                                                                                                                                                                                                                                                                                                                                                    |            |     |     |     |      |            |      |      |  |      |  |      |      |  |      |  |      |      |      |  |                                                                                                                                                                                                                                                                                                                                                                                                                                                                                                                                                                                                                                                                                     |            |     |     |      |      |            |      |      |      |      |  |      |      |      |      |  |      |      |      |      |  |      |      |      |      |  |      |      |      |      |  |      |      |      |      |  |      |      |      |      |                                                                                                                                                                                                                                                                                                         |            |     |     |      |            |      |      |      |  |      |      |      |  |      |      |      |                                                                                                                                                                                                                                                                                                                                                                 |            |     |     |      |      |            |      |      |      |      |  |      |      |      |      |  |      |      |      |      |
|                                                          | 32.3                                                                                                                                                                                   | 32.4                                  | 32.4                                 | 32.2                                  |                                      |  |      |  |      |                                                                                                                                                                                                                                                                                                                                                    |            |     |     |     |      |            |      |      |  |      |  |      |      |  |      |  |      |      |      |  |                                                                                                                                                                                                                                                                                                                                                                                                                                                                                                                                                                                                                                                                                     |            |     |     |      |      |            |      |      |      |      |  |      |      |      |      |  |      |      |      |      |  |      |      |      |      |  |      |      |      |      |  |      |      |      |      |  |      |      |      |      |                                                                                                                                                                                                                                                                                                         |            |     |     |      |            |      |      |      |  |      |      |      |  |      |      |      |                                                                                                                                                                                                                                                                                                                                                                 |            |     |     |      |      |            |      |      |      |      |  |      |      |      |      |  |      |      |      |      |
|                                                          | 28.3                                                                                                                                                                                   | 28.4                                  | 28.5                                 | 27.9                                  |                                      |  |      |  |      |                                                                                                                                                                                                                                                                                                                                                    |            |     |     |     |      |            |      |      |  |      |  |      |      |  |      |  |      |      |      |  |                                                                                                                                                                                                                                                                                                                                                                                                                                                                                                                                                                                                                                                                                     |            |     |     |      |      |            |      |      |      |      |  |      |      |      |      |  |      |      |      |      |  |      |      |      |      |  |      |      |      |      |  |      |      |      |      |  |      |      |      |      |                                                                                                                                                                                                                                                                                                         |            |     |     |      |            |      |      |      |  |      |      |      |  |      |      |      |                                                                                                                                                                                                                                                                                                                                                                 |            |     |     |      |      |            |      |      |      |      |  |      |      |      |      |  |      |      |      |      |

## Section S2. Instability of Pressure Transducers and Pumping Rate

Figure S1 shows exemplary datasets of what we have defined as defective datasets. Such datasets have been eliminated from further processing. In general, we excluded datasets showing a drawdown signal that evidently does not correspond to the true signal of pumping. As shown in Figure S1, the instability of pressure transducer recordings can be expressed differently, including a steady decrease of drawdown (lowermost blue and yellow drawdown curves in Figure S1), a continuous trend in drawdown (green drawdown curve in Figure S1) or no response to pumping at all.

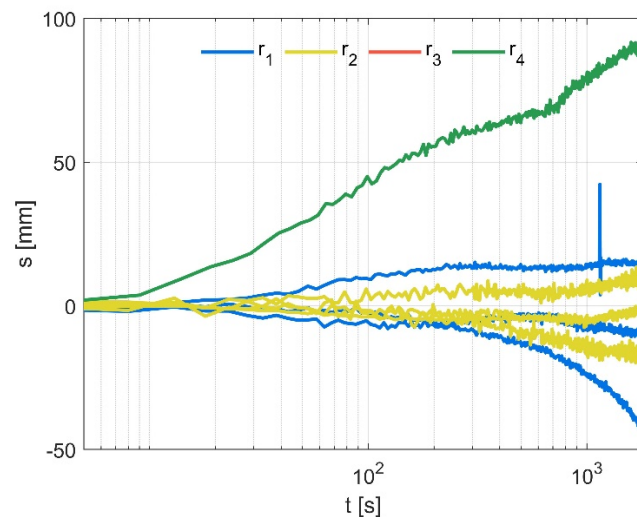

Figure S1. Datasets excluded from model calibration due to instable pressure transducer recordings.

With respect to flow rate stability, we assess the entire pumping phase including the late-term steady discharge. In preceding tests and during the main pumping tests, we have examined that the system shows an incredibly quick response to changes in the flow rate. Thus, we were able to identify flow rate instabilities not only directly from flow rate readings but also from observation data.

### Section S3. Steady-Shape Pumping Regime

We consider the steady-shape pumping regime in which the absolute drawdowns are still changing but the hydraulic head differences between observation locations remain constant. We show an exemplary dataset to demonstrate the identification of the steady-shape pumping regime. Figure S2a shows the absolute drawdowns versus pumping time until timepoint  $t_{\text{trim}} = 1800$  s obtained with pumping test  $p_t = 5$  of hydraulic test I, i.e. when water was extracted from the upper screen. The drawdowns increase with time and decrease with increasing radial distance to the well (different colors in Figure S2a). Figure S2b shows the difference in drawdown between all observation points and observation point W04.3 chosen as an exemplary reference point. Contrary to the absolute drawdowns the drawdown differences appear to remain constant after a pumping time of  $\sim 15$  min, that is, prior to the selected timepoint  $t_{\text{trim}}$ . To assess the change in drawdown we compute the logarithmic derivative (Figure S2c). Figure S2c indicates that the logarithmic derivative stabilizes prior to timepoint  $t_{\text{trim}}$  with differences smaller than 1 mm.

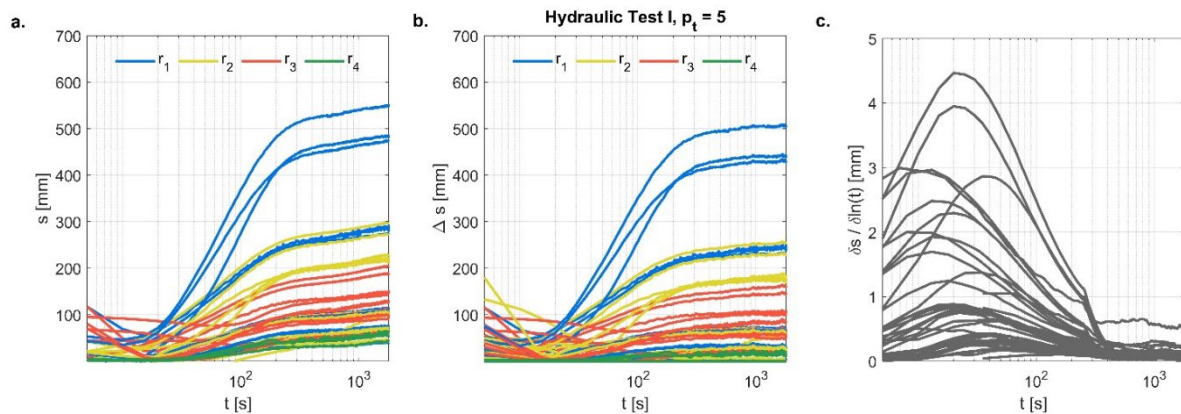

Figure S2. a. Absolute drawdown measurements versus pumping time. b. Drawdown differences between all observation points and observation point W04.3. c. Logarithmic derivative.

Section S4. Figure 7 of the main article in Log-Log Scale

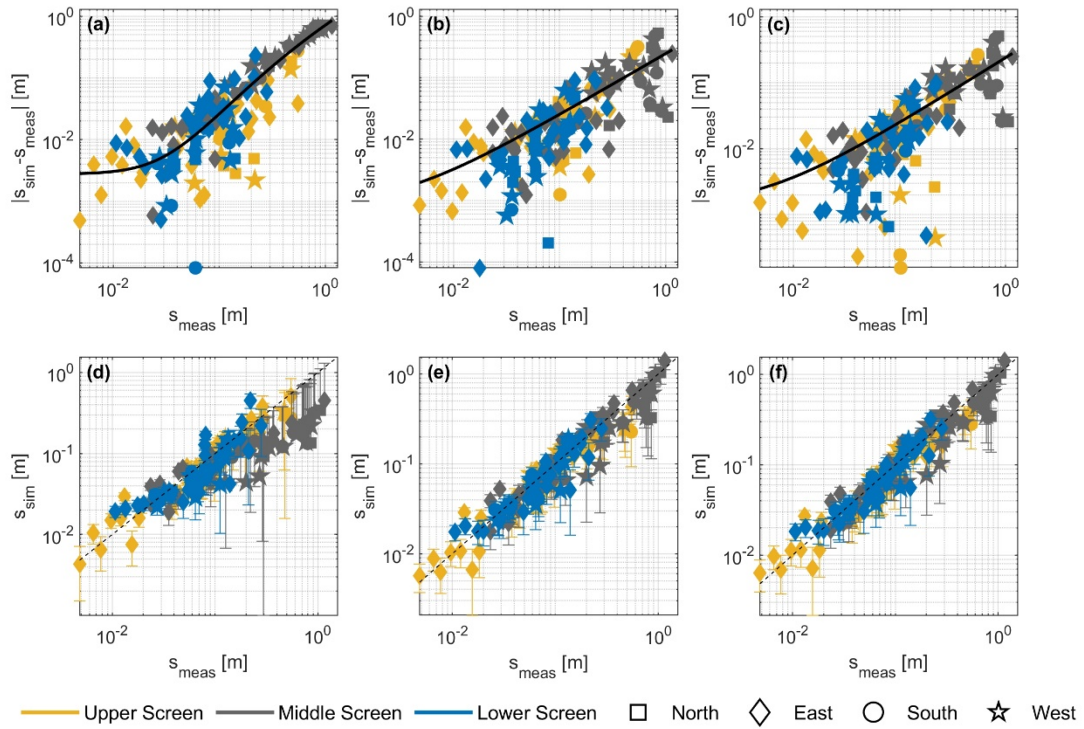

Figure S3. Assessment of model results. (a-c): Absolute difference between simulated and measured drawdown versus the measured drawdowns of the 1-layer model (a), 3-layer model (b), and 5-layer model (c) and the thereto fitted error models. (d-f): Field measurements versus simulated results of the best fitting 1-layer model (d), 3-layer model (e), and 5-layer model (f) with error-bars according to the error model. The black dashed diagonal lines represent the 1:1-identity lines.

## Section S5. Assessing the Effective Conductivity Estimates

After model calibration we consider the effective conductivity estimates of the 5-layer model and feed these values to the 1-layer model. Figure S3 shows the resulting simulated drawdowns versus the measured drawdowns and the 1:1-identity line (black line in Figure S3). We compare the measurement fit of the 1-layer model when using the effective values from the 5-layer model (Figure S3) with the measurement fit based on the effective values resulting from the 1-layer model calibration (Figure S1c). Comparing Figure S3 and Figure S1c indicates that considering a homogeneous model with the effective conductivity estimates obtained from a multilayer model does not yield any improvement nor any deterioration in fitting the true drawdown measurements. This suggests that the effective horizontal hydraulic conductivity and effective vertical hydraulic conductivity are little informative when neglecting vertical differences of the hydraulic conductivity within the aquifer.

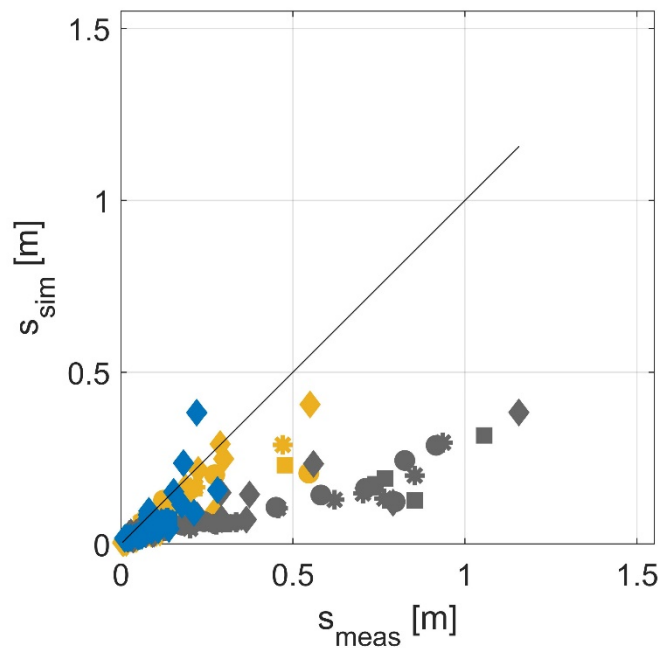

Figure S4. Simulated drawdowns versus measured drawdowns when running the 1-layer model with the effective conductivity estimates obtained from the 5-layer model calibration. The black diagonal line presents the 1:1-identity line.

## Section S6. Markov-Chain Monte Carlo Results of Hydraulic Conductivity Values

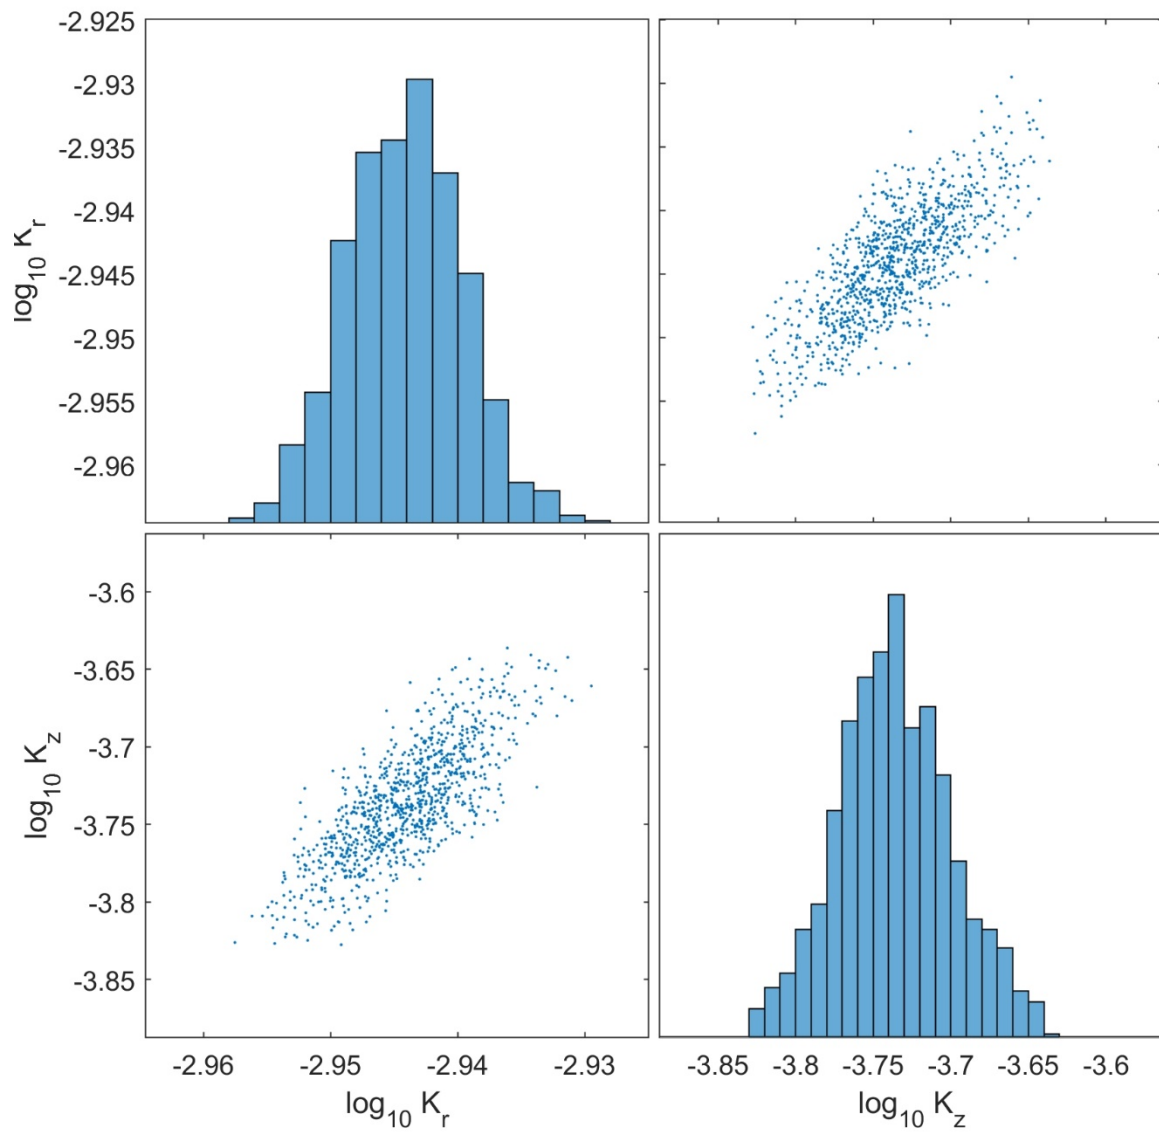

Figure S5. Pairwise scatter plots of hydraulic conductivity values in the MCMC sampling of the 1-layer model.

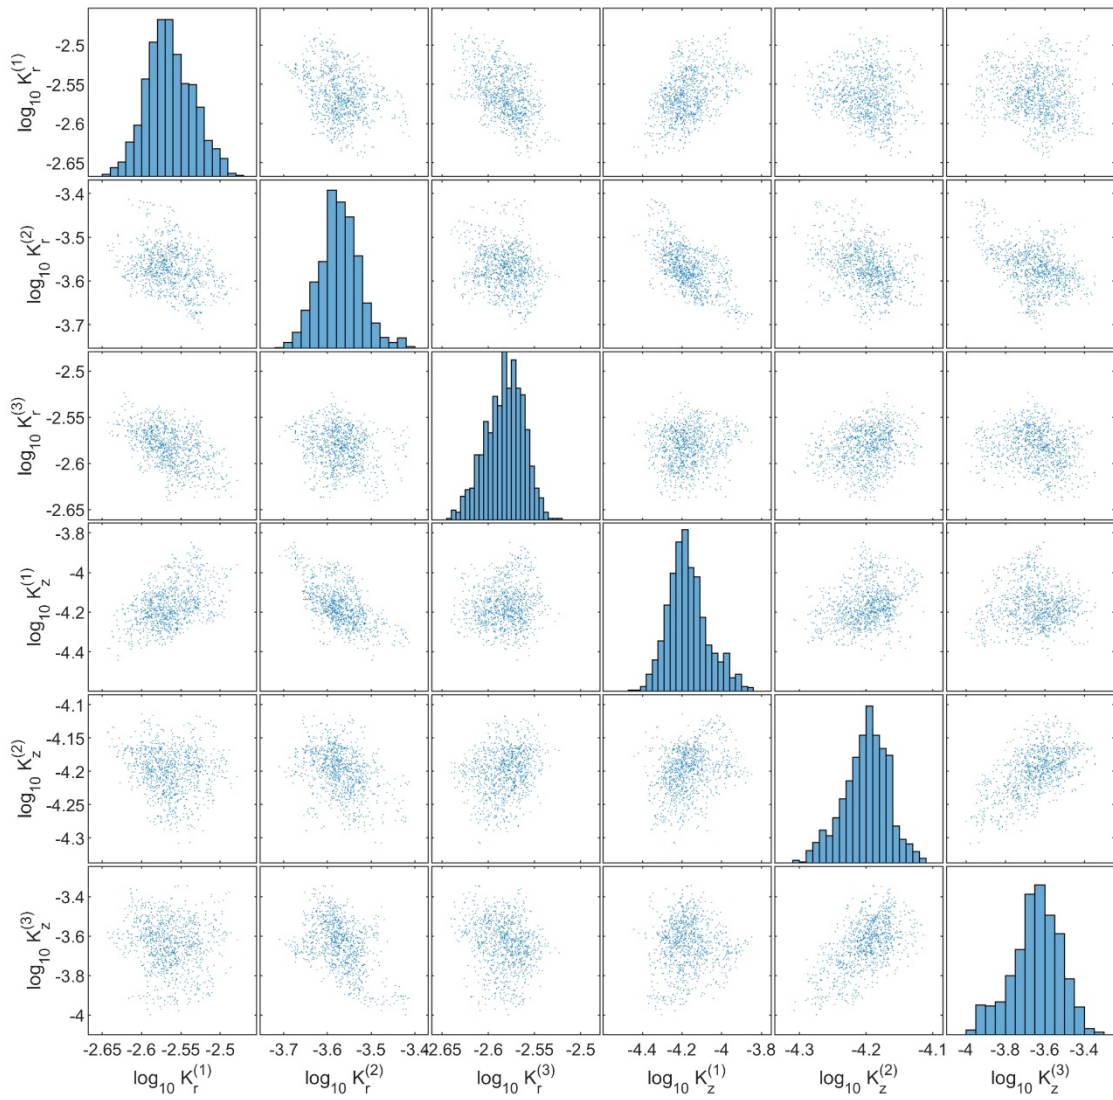

Figure S6. Pairwise scatter plots of hydraulic-conductivity values in the MCMC sampling of the 3-layer model.



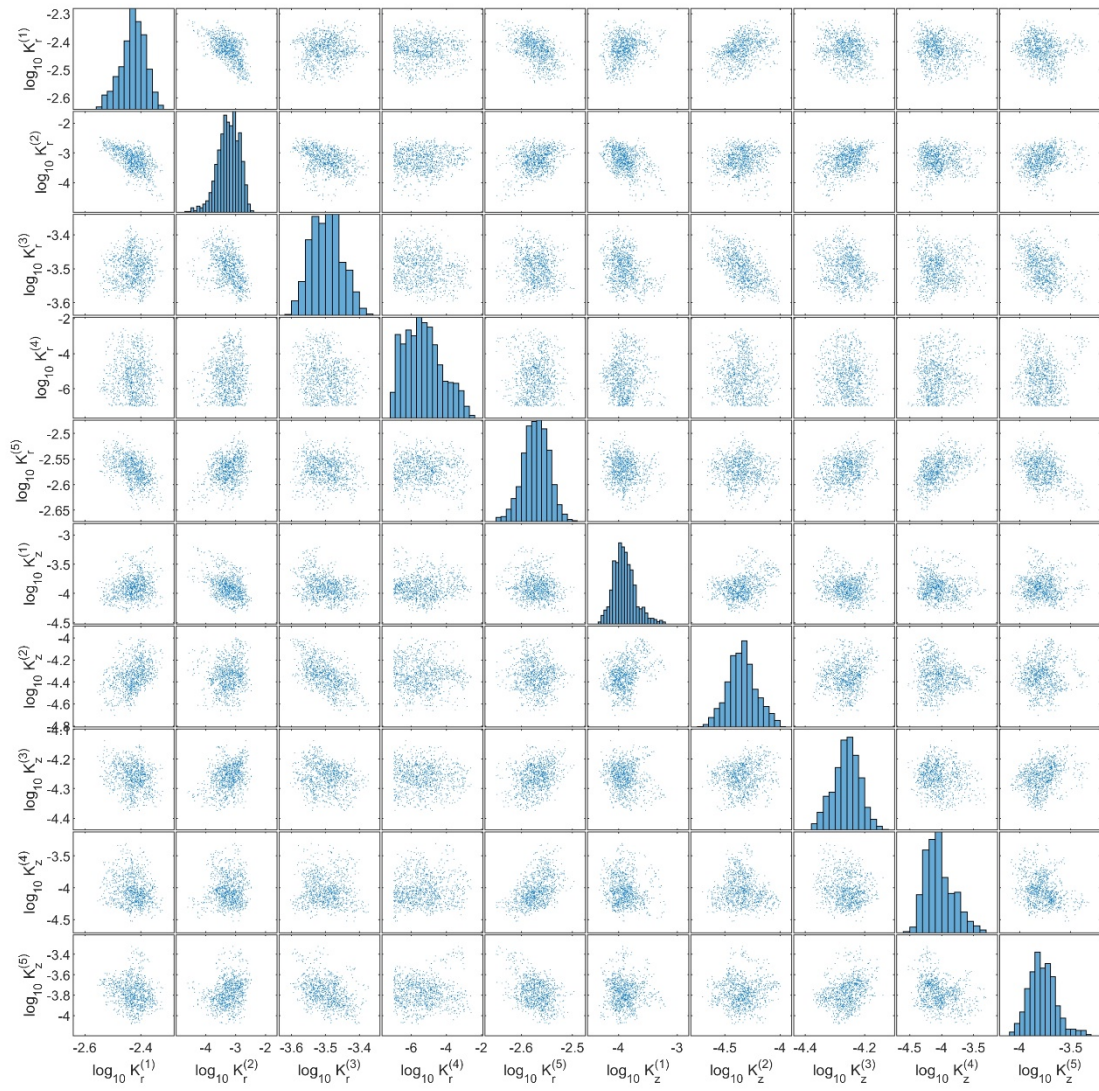

Figure S7. Pairwise scatter plots of hydraulic conductivity values in the MCMC sampling of the 5-layer model.
